# Supplementary material
Source: publisher figshare collection journal article supplement (https://karger.figshare.com/articles/dataset/_/5129275)
Supplement: Supplementary file 1 [file 1]

### Supplementary Table 1

Relative quantitative mRNA expression in intrapulmonary arteries from WT and PKC $\alpha^{-/-}$  mice normalized to GAPDH expression levels and compared to expression levels in WT mice.

| Target         | Mouse Strain       | n | Relative mRNA expression |      |          |
|----------------|--------------------|---|--------------------------|------|----------|
|                |                    |   | mean                     | SEM  | p-value  |
| PKC $\beta$    | WT                 | 4 | 2.72                     | 1.93 | 0.29     |
|                | PKC $\alpha^{-/-}$ | 5 | 17.09                    | 8.64 |          |
| PKC $\gamma$   | WT                 | 4 | 1.26                     | 0.55 | 0.73     |
|                | PKC $\alpha^{-/-}$ | 5 | 1.43                     | 0.31 |          |
| PKC $\delta$   | WT                 | 6 | 1.14                     | 0.26 | 0.31     |
|                | PKC $\alpha^{-/-}$ | 6 | 1.68                     | 0.43 |          |
| PKC $\epsilon$ | WT                 | 5 | 1.19                     | 0.28 | 0.79     |
|                | PKC $\alpha^{-/-}$ | 6 | 1.03                     | 0.27 |          |
| PKC $\eta$     | WT                 | 4 | 1.68                     | 0.86 | 0.89     |
|                | PKC $\alpha^{-/-}$ | 4 | 1.44                     | 0.31 |          |
| PKC $\theta$   | WT                 | 5 | 1.74                     | 0.94 | 0.56     |
|                | PKC $\alpha^{-/-}$ | 4 | 3.41                     | 2.30 |          |
| PKC $\zeta$    | WT                 | 4 | 1.56                     | 0.81 | 1.0      |
|                | PKC $\alpha^{-/-}$ | 5 | 0.91                     | 0.16 |          |
| PKC $\iota$    | WT                 | 7 | 1.12                     | 0.25 | 0.005 ** |
|                | PKC $\alpha^{-/-}$ | 5 | 3.07                     | 0.39 |          |
| TP receptor    | WT                 | 6 | 1.17                     | 0.27 | 0.030 *  |
|                | PKC $\alpha^{-/-}$ | 5 | 3.18                     | 0.56 |          |
