# Supplementary material
Source: publisher figshare collection journal article supplement (https://karger.figshare.com/articles/dataset/_/5129275)
Supplement: Supplementary file 2 [file 1]

Supplementary Figure 1

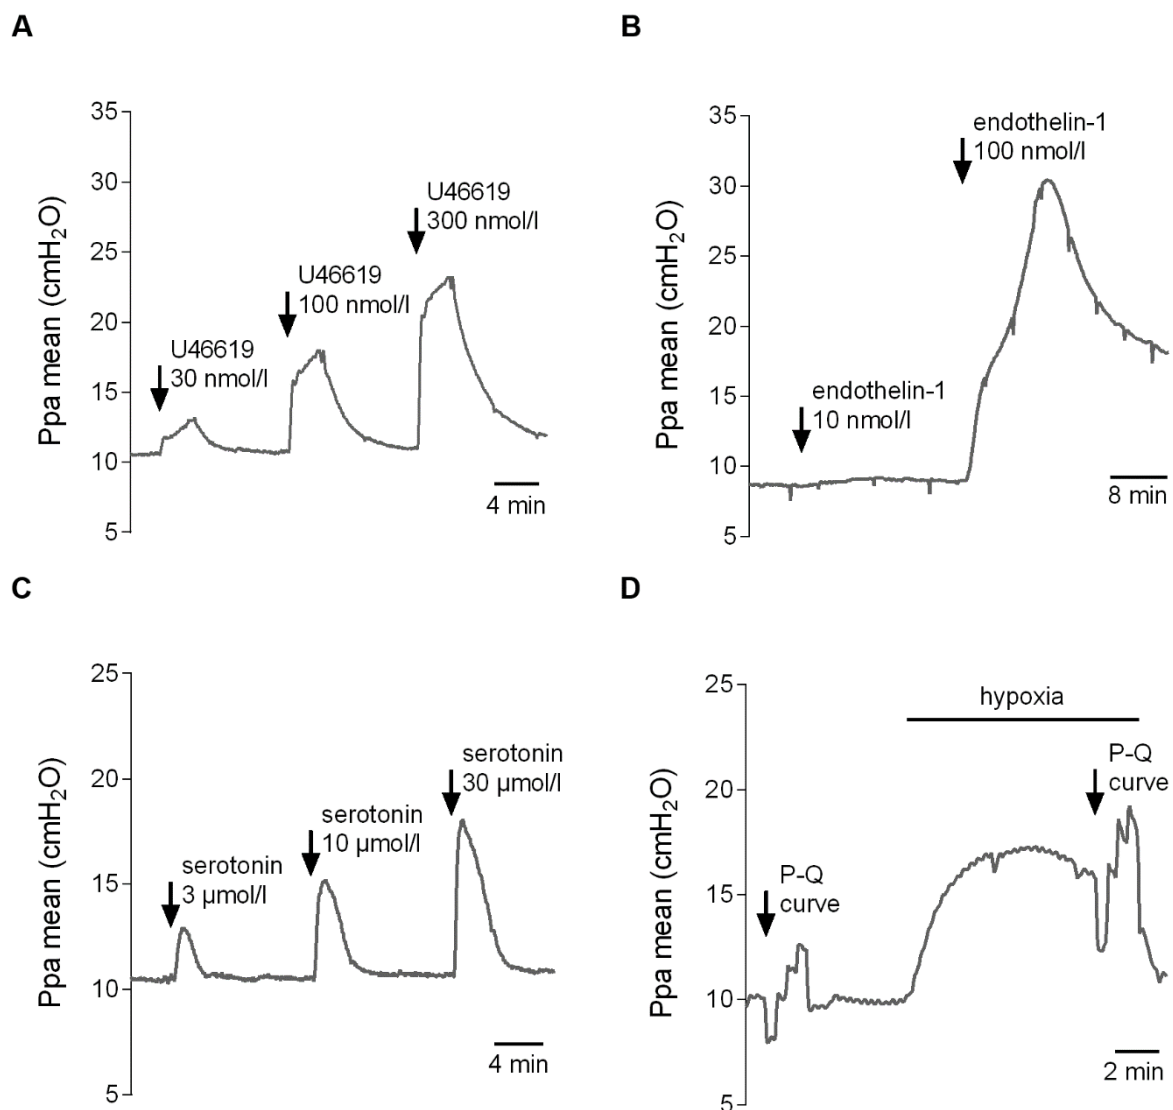

**Fig. S1.** Representative tracings of Ppa mean in isolated perfused and ventilated mouse lungs in response to increasing doses of (A) thromboxane receptor agonist U46619, (B) endothelin-1 and (C) serotonin, as well as (D) in response to pressure-flow (P-Q) curves (perfusate flow of 0.5, 1, 1.5, or 2 mL  $\times$  min<sup>-1</sup> for 30 s each) at normoxia or hypoxia (1% O<sub>2</sub>).

Supplementary Figure 2

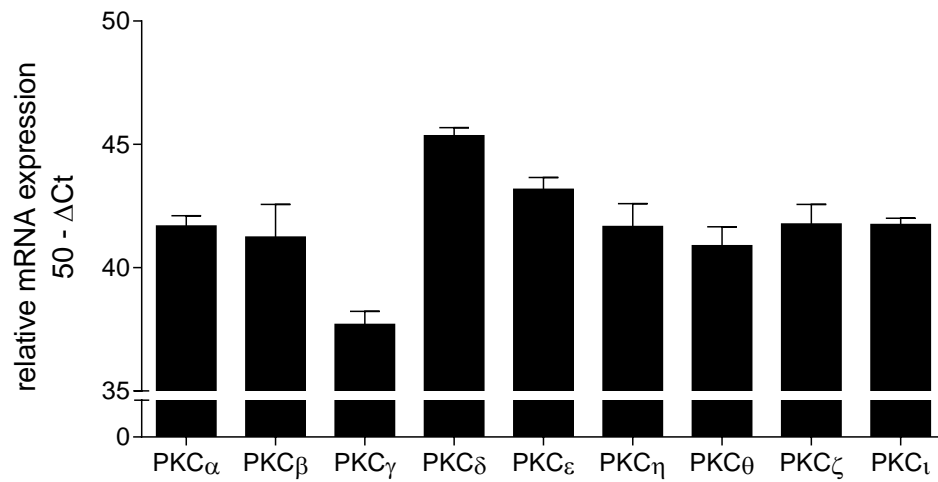

**Fig. S2.** Relative mRNA expression levels of PKC isozymes in microdissected intrapulmonary arteries of wildtype mice. Ct values were determined for each isozyme and the housekeeping control gene glyceraldehyde 3-phosphate dehydrogenase (GAPDH).  $\Delta$ Ct values were calculated and subtracted from 50 ( $50 - \Delta$ Ct). High values indicate high expression levels and vice versa. Values are shown as mean+SEM; n=4-7 per group.
